1  
2  
3  
4  
5  
6  
7  
8  
9  
10  
11  
12  
13  
14  
15  
16  
17  
18  
19  
20  
21  
22

**Gene regulatory network rewiring  
by an adaptively evolving microRNA cluster in *Drosophila***

Yang Lyu<sup>1,3,+</sup>, Zhongqi Liufu<sup>1,+</sup>, Juan Xiao<sup>1</sup>, Yuxin Chen<sup>1</sup>, Chung-I Wu<sup>1,2</sup>, Tian Tang<sup>1,\*</sup>

1 State Key Laboratory of Biocontrol and Guangdong Key Laboratory of Plant Resources, School of Life Sciences, Sun Yat-sen University, Guangzhou 510275, Guangdong, China

2 Department of Ecology and Evolution, University of Chicago, 1101 E. 57th Street, Chicago, IL 60637, USA.

3 Current address: Department of Molecular and Integrative Physiology and Geriatrics Center, Biomedical Sciences and Research Building, University of Michigan, Ann Arbor, MI 48109, USA.

<sup>+</sup> These authors contributed equally.

\* corresponding author

[lsstt@mail.sysu.edu.cn](mailto:lsstt@mail.sysu.edu.cn)

23 **Abstract**

24 New miRNAs are evolutionarily important but their impact on existing biological networks remains  
25 unclear. We report the evolution of a microRNA cluster, *mir-972C*, that arose *de novo* and the subsequently  
26 rewired gene regulatory networks in *Drosophila*. Molecular evolution analyses revealed that *mir-972C*  
27 originated in the common ancestor of *Drosophila* where it comprises five old miRNAs. It subsequently  
28 recruited five new members in the *melanogaster* subgroup after conservative evolution for at least 50 million  
29 years. Population genetics analyses reveal that young and old *mir-972C* miRNAs evolved rapidly under  
30 positive selection in both seed and non-seed regions. Combining target prediction and cell transfection  
31 experiments, we find that sequence changes in individual *mir-972C* members resulted in extensive gene  
32 regulatory network divergence among *D. melanogaster*, *D. simulans*, and *D. virilis*, whereas the target pool of  
33 the cluster as a whole remains relatively conserved. Our results suggest that clustering of young and old  
34 miRNAs at the same locus broadens target repertoires, resulting in the gain of new targets without losing  
35 many old ones. This may facilitate the establishment of new miRNAs within existing regulatory networks.

36

37 **Keywords:** new miRNA, miRNA cluster, miRNA evolution, positive selection, gene regulatory network,  
38 testis, *Drosophila*

39

40

## 41 **1. Introduction**

42 Newly-evolved genes constitute at least 10-20% of the genome (1, 2) and are among the most  
43 conspicuous mechanisms underlying biological innovation (3, 4). Increasing evidence suggests that a large  
44 fraction of these new genes is functionally important (1, 4, 5). Using experimental genetic approaches that  
45 repress transcripts (6) or disrupt DNA sequences (1, 7) of new genes, previous studies have identified a  
46 number of key primarily testes-expressed protein-coding genes that modulate male production (1, 6), sperm  
47 competition (8), courtship (9), and pheromone metabolism (10). The functional importance of testes-expressed  
48 genes is also supported by the prominent signatures of positive selection at these loci (11). Despite the  
49 evolutionary significance of new genes, we know much less about how these novel components integrate into  
50 existing regulatory networks. Transcriptomic and protein-protein interaction studies suggest that the targets of  
51 new genes change dramatically even among closely related species (7, 12), yet the underlying mechanisms are  
52 unclear.

53 To understand how novel genes mediate among-species divergence of regulatory networks, we need to  
54 predict and measure interactions between these new genes and their partners. This is quite challenging for  
55 protein-coding genes, as the assays required to establish regulatory or physical interactions are technically  
56 demanding. New microRNAs (miRNAs) offer an excellent opportunity to tackle the problem. miRNAs are a  
57 class of ubiquitous post-transcriptional regulators that participate in diverse biological processes in eukaryotes  
58 (13). In animals, mature miRNAs (~22nt) bind 3' UTRs of transcripts through perfect base-pairing with the  
59 seed region (2-8<sup>th</sup> nucleotides of the mature sequence) (14), inducing translational repression or mRNA  
60 degradation (15). It is well-established that the impact of miRNAs on the transcriptome is broad, as each  
61 miRNA has hundreds of targets (16). The effects on individual targets, however, are weak. Even the most  
62 abundant miRNAs repress single genes by less than 20% (17, 18).

63 Using next-generation sequencing techniques, previous studies identified a large cohort of new miRNAs  
64 from a number of taxa (19). We have previously reported the rapid birth and death of miRNAs in *Drosophila*,  
65 a well-studied model system for genetics and molecular evolution. Over 40% of miRNAs are lineage-specific  
66 (20). Among these evolutionarily young miRNAs, 95% have appeared *de novo*, and their seed shares no  
67 similarities to existing molecules (20). It appears that these newly-evolved miRNAs introduce a wide array of  
68 novel miRNA-mRNA interactions. Like new protein-coding genes, new miRNAs are primarily  
69 testes-expressed and exhibit strong signatures of positive selection (20). Working out the mechanisms that  
70 underlie co-evolution of new miRNAs and testes transcriptomes will provide key insights into new gene

71 evolution processes. For example, we want to know how novel components originate and are assimilated into  
72 biological networks. We are also interested in the critical factors that determine whether a new gene will  
73 survive and spread into multiple evolutionary taxa.

74 To understand how newly-evolved miRNAs shape regulatory networks and transcriptomes, and to  
75 identify any selective advantage of such systematic change, we focused on a *de novo* originated, fast-evolving  
76 and testes-biased miRNA cluster that includes *mir-972* (we refer to the whole cluster as *mir-972C*). It consists  
77 of ten miRNA members and is by far the largest new miRNA cluster in *Drosophila melanogaster* (20). We  
78 investigate molecular divergence of *mir-972C* among *Drosophila* lineages and study network rewiring in *D.*  
79 *melanogaster*, *D. simulans*, and *D. virilis*. We discuss the implications of our results for the possible driving  
80 forces underlying the evolution of new miRNA clusters and their long-term fate.

81

## 82 **2. Material and Methods**

### 83 **(a) Genomic data used**

84 *mir-972C* sequences and coordinates were obtained from miRBase (mirbase.org, Release 19). Genome  
85 sequences were retrieved from UCSC (genome.ucsc.edu). The genome versions used here are: *D.*  
86 *melanogaster*, dm3; *D. simulans*, droSim1; *D. sechellia*, droSec1; *D. yakuba*, droYak2; *D. erecta*, droEre2; *D.*  
87 *ananassae*, droAna3; *D. pseudoobscura*, dp4; *D. virilis*, droVir3; *Anopheles gambiae*, MOZ2; *Apis mellifera*,  
88 Amel\_2.0. GTF annotation files, 3'UTR sequences. 3'UTR locations were downloaded from flyBase  
89 (flybase.org, file version: *D. melanogaster*, r6.17; *D. simulans*, r2.02; *D. virilis*, r1.06). Small RNA and  
90 mRNA testes deep-sequence libraries from *D. melanogaster*, *D. simulans*, *D. pseudoobscura*, and *D. virilis*  
91 (20-24) were retrieved from the GEO database and listed in Table S1.

92

### 93 **(b) miRNA homolog search and phylogenetic inference**

94 We searched for *mir-972C* sequences in downloaded genomes using BLAT with the threshold  $E < 0.001$ .  
95 miRNA homologs from different species were aligned using MUSCLE with default parameters. To validate  
96 miRNAs in *D. melanogaster*, *D. simulans*, *D. pseudoobscura*, and *D. virilis*, we first predicted secondary  
97 structures and thermostability of precursors using RNAfold v2.0 (25) with default parameters. A proper  
98 hairpin with free energy less than 15 kcal /mol was considered as a potential miRNA. To validate the  
99 expression of miRNAs, small RNA sequence reads (Table S1) were mapped to miRNA precursors using  
100 bowtie (parameters: -n 0 -v 0 -f -k 50 -a -p 10) (26). The *mir-972C* homologs covered by at least 10 reads

101 within mature regions were considered as authentic miRNAs. Maximum parsimony analysis was used to infer  
102 the origination of the *mir-972C* members by assuming that a miRNA emerged in the most recent common  
103 ancestor of all species bearing verified homologs.

104

### 105 **(c) Molecular evolution and population genetics**

106 Molecular divergence, polymorphism, and neutrality tests were computed using in-house perl scripts  
107 using the following datasets and methods. Sequence alignments of the *mir-972C* precursors were used to  
108 calculate evolutionary divergence ( $K$ ) between *D. melanogaster* and four other *Drosophila* species: *D.*  
109 *simulans*, *D. erecta*, *D. ananassae*, and *D. virilis*. *D. pseudoobscura* was not included in this analysis because  
110 the whole *mir-972C* region was completely lost in this species. Divergence of protein coding genes was  
111 calculated as a reference. The protein coding sequence alignment was downloaded from AAA  
112 (Assembly/Alignment/Annotation of 12 *Drosophila* Genomes, [rana.lbl.gov/drosophila/alignments.html](http://rana.lbl.gov/drosophila/alignments.html)). The  
113 Nei-Gojobori model (27) was used to calculate  $K_s$  (synonymous substitutions per site) and  $K_a$   
114 (nonsynonymous substitutions per site) of the protein coding genes, and the Kimura's two-parameter method  
115 (28) was used to calculate divergence among miRNA sequences. *D. melanogaster* polymorphic sites were  
116 extracted from 50 genomes of the *Drosophila* Population Genomics Project (DPGP; [dpgp.org](http://dpgp.org)). The *D.*  
117 *simulans* genome (droSim1) was used as an outgroup to infer ancestral states of segregating sites. Three  
118 estimates of nucleotide diversity ( $\theta$ ), i.e.  $\theta_\pi$  (29),  $\theta_W$  (30), and  $\theta_H$  (31), were calculated. The DH test  
119 was performed as described in (32).

120

### 121 **(d) Target evolution and functional analyses**

122 We predicted target sites based on complementary sequence matches between 3'UTRs and seed regions.  
123 To select testes-expressed genes, we used the published testes RNA-seq data (Table S1) and mapped the reads  
124 to the genome using STAR (parameters: --runThreadN 4 --runMode genomeGenerate) (33). Read counts at  
125 the gene level were calculated by counting all reads that overlapped any exon for each gene using  
126 featureCounts (34) and normalizing to TPM (Transcripts Per Kilobase Million). We used mean TPM from  
127 multiple replicates for our analyses. Genes with  $\text{TPM} \geq 1$  were considered expressed. The number of targets  
128 in common among different species was visualized using BioVenn (35). We used DAVID to perform the Gene  
129 Ontology (GO) enrichment test for the predicted targets (DAVID v6.7, [david.abcc.ncifcrf.gov](http://david.abcc.ncifcrf.gov), EASE < 0.05,

130 adjusted  $p$ -value  $< 0.05$ ) (36).

131

### 132 (e) *In vitro* validation of miR-975 targets

133 To construct the *pUAST-mir-975* plasmid from each species, we amplified *mir-975* from the genomic  
134 sequences of *D. melanogaster* (ISO-1), *D. simulans* (simNC48S), and *D. virilis* (V46) and cloned the  
135 fragments into the *pUAST* vector (see Table S3 for primers and restriction sites). PCR reactions were carried  
136 out using the EX-Taq DNA Polymerase (TAKARA). Cells were transfected to 48-well plates with 100 ng of  
137 *ub-GAL4* and 200 ng of conspecific *pUAST-mir-975* or the control vector (*pUAST* only) using Lipofectamine  
138 2000 (Thermo Fisher Scientific, catalog no.12566014), and were harvested 48 hours after transfection.

139 Total RNA was extracted from cells using TRIzol (Thermo Fisher Scientific, catalog no. 15596026) for  
140 qRT-PCR and RNA-seq assays. Total RNAs were reverse-transcribed into cDNAs using stem-loop reverse  
141 transcription and analyzed using the TaqMan qRT-PCR method following the miRNA UPL (Roche  
142 Diagnostics) probe assay protocol (37). The 2S RNA was used as the endogenous control (see table S4 for the  
143 qRT-PCR primers). cDNA libraries for transcriptome assays were generated from each RNA sample and  
144 sequenced using Illumina HiSeq 2000 at the Beijing Genomics Institute (Shenzhen). Reads were mapped to  
145 genomes using TopHat (v.1.3.1) with the parameter  $-r\ 20$  (38). Gene expression was estimated use FPKM  
146 (Fragments Per Kilobase per Million) using Cufflinks (v.2.1.1) with default parameters (39). Differentially  
147 expressed genes were estimated using Cuffdiff (v.2.1.1) with default parameters (39). Non-expressed genes  
148 (FPKM=0) were removed from further analyses. *mir-975* targets were predicted based on seed match using  
149 an in-house perl script.

150

## 151 3. Results

### 152 (a) Emerging new members in an old miRNA cluster

153 The *mir-972C* cluster of *D. melanogaster* comprises ten miRNAs spanning a 10.8-kb region located in  
154 the 18C-D band of the X chromosome. Based on genomic proximity among members, it was further divided  
155 into three sub-clusters (*mir-972/973/974*, *mir-4966/975/976/977*, *mir-978/979*), spanning less than 1 kb each,  
156 and an orphan miRNA *mir-2499* (Figure 1). The *mir-972C* members most likely originated *de novo*, as no  
157 sequence similarity was found either between the cluster members, or between them and other miRNAs that  
158 have been characterized in *D. melanogaster* (BLAST search,  $E < 0.001$ ).

159 To investigate the origin and evolution of *mir-972C*, we searched for orthologs of these miRNA genes in

160 other *Drosophila* species, as well as in *Aedes* (mosquito) and *Apis* (honey bee) which have diverged from  
161 *Drosophila* 250 and 300 million years ago, respectively (40, 41). We found homologous sequences in all  
162 seven *Drosophila* genomes surveyed (*D. simulans*, *D. yakuba*, *D. erecta*, *D. ananassae*, *D. pseudoobscura*, *D.*  
163 *mojavensis*, and *D. virilis*), but failed to detect any homologs in the mosquito or honey bee genomes. This  
164 result indicates that *mir-972C* emerged in the common *Drosophila* ancestor between 60 and 250 million years  
165 ago. After origination, members of *mir-972C* have undergone rapid birth and death. We only detected  
166 *mir-2499* and *mir-979* in the *D. pseudoobscura* genome, suggesting the loss of *mir-972C* members in this  
167 lineage. The distribution of individual miRNAs also varies across the remaining species. For example,  
168 *mir-973/974/975/976/977* sequences are represented in all seven species, while other miRNAs have been lost  
169 in various lineages (Figure 1).

170 To date the origin time of each miRNA, we first used testes small RNA sequence data to validate that  
171 individual *mir-972C* members are expressed in four *Drosophila* species: *D. melanogaster*, *D. simulans*, *D.*  
172 *pseudoobscura*, and *D. virilis* (Table S1). A miRNA was considered validated if it (1) showed a predicted  
173 hairpin structure with at least moderate thermostability (free energy < -15 kcal/mol) and (2) had more than ten  
174 short reads that matched its mature sequence. We found that *mir-973/974/975/976/977* are expressed in *D.*  
175 *melanogaster*, *D. simulans*, and *D. virilis*; *mir-972/2499/4966/978* are expressed in *D. melanogaster* and *D.*  
176 *simulans*; and *miR-979* is expressed solely in *D. melanogaster*. No expression of miRNA homologs in *D.*  
177 *pseudoobscura* was detected.

178 Taken together, these results indicate that *mir-972C* has initially originated in the common ancestor of  
179 *Drosophila* and subsequently diverged in different clades. This cluster is largely ancestral in *D. virilis*, lost in  
180 *D. pseudoobscura*, and, most interestingly, has been constantly recruiting new members in the *D.*  
181 *melanogaster/D. simulans* branch. Although the cluster originated more than 60 million years ago, the  
182 youngest member, *mir-979*, emerged as recently as 4 Myrs ago. Based on the phylogeny, we classified  
183 *mir-972C* members into new members that originated after the *Sophophora/Drosophila* split  
184 (*mir-972/2499/4966/978/979*) and old members that arose before that event (*mir-973/974/975/976/977*).

185

#### 186 **(b) Both new and old *mir-972C* members are evolving rapidly under recent positive selection**

187 We focused on the sequence evolution of *mir-972C* members in *D. melanogaster*, *D. simulans*, and *D.*  
188 *virilis*, where the mature and miR\* sequences were confirmed by deep sequencing. We found the rapid  
189 sequence change in both the new and old members (Figure S1). In total, 180 out of 783 sites (23.0%) exhibit



190 substitutions in miRNA precursors. Surprisingly, 28 of the 180 substitutions (15.6%) reside in mature  
191 sequences, which are highly conserved in the vast majority of miRNAs. To compare the evolutionary rates  
192 between *mir-972C* members and other miRNAs, we calculated the miRNA precursor substitution rates  
193 ( $K_{precursor}$ , denoted as  $K_p$ ) between *D. melanogaster* and other *Drosophila* species, normalizing it by  
194 genome-wide synonymous site ( $K_s$ ) substitution rates. Figure 2 shows that the  $K_p/K_s$  value of *mir-972*  
195 members is significantly higher than the entire miRNA population between *D. melanogaster* and closely  
196 related species (i.e. *D. simulans* and *D. erecta*, divergence time 4 Myrs and 10 Myrs respectively). However,  
197 these differences disappeared once the divergence time was increased to 16 Myrs (i.e. between *D.*  
198 *melanogaster* and *D. ananassae*), or more (i.e. between *D. melanogaster* and *D. virilis*). Consistent with the  
199 sequence alignment (Figure S1), both the new and the old members show increased  $K_p/K_s$  in the last 10 Myrs.

200 Rapid sequence evolution can either be driven by positive selection or relaxation of constraint. In our  
201 previous study, the signature of positive selection in *mir-972C* came from an excess of divergence compared  
202 to polymorphism of the miRNA precursor sequences in contrast to synonymous sequences genome-wide (20).  
203 To further validate positive selection on this cluster we utilized the DH test, a neutrality test based on the  
204 allele frequency spectrum in a population (32). The DH test takes advantage of two population allele  
205 frequency statistics: Tajima's D (29) and Fay and Wu's H (31) to achieve high specificity in detecting positive  
206 selection and was shown to be insensitive to demographic changes (32). Table 1 demonstrates that the  
207 precursor sequences of five cluster members, *mir-973/974/975/978/979* significantly deviate from the neutral  
208 simulations of the DH statistic. *mir-977* also shows a negative D and H, but the  $p$ -value is not significant ( $p =$   
209 0.06). We were unable to infer the direction of selection operating on the *mir-972/976/2499* cluster due to a  
210 lack of polymorphism.

211 Collectively, the evidence supports the inference that evolution of *mir-972C* was driven by positive  
212 selection. Members of *mir-972C*, young and old, underwent accelerated evolution only recently. Most  
213 importantly, nucleotide changes between species occurred even in the mature sequences which are mostly  
214 constrained by purifying selection (42). Such changes in mature miRNAs presumably have profound impact  
215 on the downstream regulatory network via shifts in miRNA target repertoires.

216

### 217 **(c) miRNA regulatory network rewiring through seed innovation**

218 To examine the evolution of the regulatory network mediated by miR-972C, we first documented seed  
219 changes among *D. melanogaster*, *D. simulans*, and *D. virilis*. The precursor alignment (Figure S1) reveals two



220 types of seed changes: seed shifting (e.g. *mir-978*) and arm switching (e.g. *mir-975*). We further demonstrate  
221 these two events on the phylogenetic tree. As shown in Figure 3a, six of the eight events occurred after the  
222 split of *D. melanogaster* and *D. simulans* 4 Myrs ago. Both the new and old *miR-972C* members are involved  
223 in this seed innovation. The arm switching of *mir-975* occurred after the split of *D. virilis* and *D.*  
224 *melanogaster* / *D. simulans* but it is unclear on which branch. *mir-973* is the only member that experienced  
225 both seed shifting and arm switching, and its seed is different among all three species (Figure S1).

226 Before studying the evolution of *miR-972C* targets, we wanted to make sure that miRNAs and targets are  
227 co-expressed in the testes. To this end, RNA-seq reads from the testes of *D. melanogaster*, *D. simulans*, and *D.*  
228 *virilis* (21, 22) were mapped to their respective genomes and the number of reads within each gene was  
229 normalized to TPM (Transcript Per Million). After removing the genes whose expression was not supported  
230 by enough reads (TPM < 1), we retained 13,484 genes in *D. melanogaster*, 13,752 in *D. simulans*, and 11,831  
231 in *D. virilis* for further analyses. Using this dataset, we next predicted miRNA targets based on matching of  
232 complementary sequences between miRNA seeds and target 3'UTRs for each *miR-972C* member. As shown in  
233 Figure 4b, the number of overlapping targets between the *D. melanogaster* / *D. simulans* branch and *D. virilis*  
234 is extremely small (<10 for each miRNA), even though the seed sequences remain the same for *mir-974* and  
235 *mir-977*. These results suggest that 3'UTR divergence plays a major role in *miR-972C* target evolution.

236 We took a closer look at the target divergence between *D. melanogaster* and *D. simulans*. While the  
237 *mir-974/975/977* seeds are identical between these species, the proportion of overlapping targets ranges from  
238 21.0% to 27.2% (Figure 3b). Both seed shifting and arm switching significantly reduced the overlap: only  
239 1.6-6.6% of targets are shared between the two species after arm switching (*mir-972/2499/4966/973*), and  
240 6.8-8.5% are shared after seed shifting (*mir-978/976*) (Figure 3b). Although the number of overlapping targets  
241 between *D. melanogaster* and *D. simulans* was small for each miRNA after seed changes, the overlap in  
242 targets for the entire cluster (19.2%) was largely comparable with that of the miRNAs with identical seeds  
243 (Figure 3c). This is likely because a 3'UTR targeted by a *miR-972C* member in one species can be targeted by  
244 a different component in another. These observations support the idea that although the targets of each miRNA  
245 evolve rapidly, the entire miRNA cluster can keep a relatively conserved target pool.

246 To understand the functional consequences of *miR-972C* target evolution, we examined the Gene  
247 Ontology (GO) enrichment of the predicted targets on each evolutionary branch using DAVID (36) (see  
248 Material and Methods and Table S2). Common targets that are shared among three species are enriched in  
249 “dorsal closure” ( $p = 7.49E-04$ ), indicating the ancestral function of this cluster (Figure 3d). After the split of

250 *D. virilis* and the *D. melanogaster*/*D. simulans* branch, the latter two species continued to gain new targets  
251 that are involved in “dorsal closure” ( $p = 4.14E-03$ ), suggesting a reinforcement of ancestral functions. We  
252 observed a burst of new GO categories on the *D. melanogaster*/*D. simulans* branch and also in *D.*  
253 *melanogaster*, consistent with the increase in target number in this lineage (Figure 3d). Interestingly, both  
254 species acquired targets involved in “membrane” functions independently ( $p = 4.73E-02$  in *D. melanogaster*  
255 and  $p = 2.02E-02$  in *D. simulans*), which may suggest convergent evolution. These results are consistent with  
256 the expectation that *miR-972C* target evolution resulted in the acquisition of novel functions without  
257 eliminating their ancestral roles.

258

#### 259 **(d) Seed and non-seed mutations contribute to regulatory network divergence measured *in vitro***

260 *mir-975* has undergone substitutions in both seed and non-seed regions and thus offers a great  
261 opportunity to compare the effects of the various miRNA functional regions on target expression. The  
262 *miR-975* seed in *D. virilis* is completely different from those in *D. melanogaster* and *D. simulans* as a result of  
263 arm switching (Figure S1). Furthermore, there is a single nucleotide substitution right after the seed region in  
264 the mature *miR-975* sequences between *D. melanogaster* and *D. simulans* (Figure S1).

265 To understand the impact of *mir-975* sequence evolution on target expression, we overexpressed the  
266 conspecific *mir-975* sequences in cells derived from *D. melanogaster* (S2), *D. simulans* (ML-82-19a), and *D.*  
267 *virilis* (WR-Dv-1) and monitored the expression changes of both *mir-975* itself and the transcriptome as a  
268 whole. Quantitative PCR confirmed that *miR-975* was only expressed in cells transfected with the  
269 *pUAST-mir-975* vector and not in cells transfected with the control empty *pUAST* vector (Figure S2). When  
270 *mir-975* was overexpressed, predicted targets were significantly downregulated compared to the background  
271 transcriptomes of the *D. melanogaster* and *D. simulans* cells (Figure S3a and b, Kolmogorov-Smirnov test,  
272 both  $p < 0.05$ ). The repression magnitude was small, consistent with the typically-observed weak  
273 miRNA-mediated repression (43). Repression of targets is not significant in *D. virilis* cells  
274 (Kolmogorov-Smirnov test,  $p = 0.30$ , Figure S3c), probably because only a few targets are predicted in this  
275 species ( $n=65$ ).

276 Using 1.2-fold repression as a cut-off (44), we found 33 targets that were downregulated in *D.*  
277 *melanogaster*, 16 in *D. simulans*, and five in *D. virilis* (Figure 4a). As expected, none of these targets were  
278 shared between *D. virilis* and the other two species, indicating that arm switching has changed the target pool  
279 completely. Between *D. melanogaster* and *D. simulans*, only 14.0% of the downregulated targets overlapped,

280 consistent with expectation (Figure 3b). Interestingly, target sites complementary to the ninth base of the  
281 *miR-975* mature sequence were enriched for purines (A or G) in *D. melanogaster* ( $p < 0.05$ , Fisher's exact test,  
282 Figure 4c) but enriched for pyrimidines (C or U) in *D. simulans* ( $p < 0.05$ , Fisher's exact test, Figure 4d),  
283 consistent with the transversion (G->U) change in the mature sequences between these species (Figure 4b).  
284 Taken together, our *in vitro* experiments demonstrate that both seed and non-seed changes in *mir-975*  
285 contribute to the divergence of miRNA regulatory networks between *Drosophila* species.

286

#### 287 **4. Discussion**

288 New genes continuously contribute to genetic novelty and offer a unique opportunity to understand the  
289 evolution of gene regulatory networks (7, 12). As key players in gene regulation, miRNAs regulate their  
290 targets weakly and broadly in animals. However, it remains unclear how new miRNAs integrate into the  
291 existing regulatory networks (20, 45). Some controversy even surrounds the assertion that new miRNAs have  
292 biological functions at all (46). Here we show that the adaptive evolution of the *mir-972C* cluster is  
293 accompanied by dramatic evolution of target repertoires between distantly and closely related *Drosophila*  
294 species. Changes of both seed and non-seed regions contribute to the target pool evolution. While the rewiring  
295 of the *mir-972C* regulatory network has resulted in the acquisition of new targets that represent novel  
296 functions in specific lineages, the vast majority of old targets are conserved when we consider the cluster as a  
297 whole. These results shed new light on the formation and evolution of new genes in general.

298 Our results suggest that clustering of new miRNAs may be beneficial to their establishment after  
299 emergence (47). Co-expression of miRNAs in a cluster allows them to greatly expand their target pools while  
300 functioning coordinately as a unit. Indeed, while only 0.9% to 4.1% of the genome is potentially targeted by  
301 individual members of *miR-972C* in *D. melanogaster* (Figure 3b), 14.4% can be influenced by the whole  
302 cluster together. Recent studies have shown that large miRNA target pools are evolutionarily beneficial in  
303 maintaining stability of gene expression (43). Consistent with this notion, a significant proportion of the  
304 *miR-972C* target pool remains unchanged (e.g., 19.2% of the targets are conserved between *D. melanogaster*  
305 and *D. simulans*, Figure 3c), even though arm switching and seed shifting occurred frequently between  
306 species. The reinforcement of ancestral functional categories of *miR-972C* targets (Figure 3d), on the other  
307 hand, also suggests this miRNA cluster continues to recruit additional targets either through the evolution of  
308 existing miRNAs or the birth of new hairpins. Such processes also bring novel functions.

309 The fast-evolving interactions with the transcriptome imply that these miRNAs had never been deeply

310 integrated into the existing gene regulatory networks, calling into question the prospects of long-term survival  
311 of these novel miRNAs. A good case in point is the *mir-310/311/312/313* cluster (*mir-310C*) in *Drosophila*,  
312 another rejuvenated miRNA cluster of about the same age as *mir-972C* (20). *mir-310C* is known to affect egg  
313 morphology, hatchability, and male fertility (48). Redundant and incoherent regulation of multiple phenotypes  
314 by *mir-310C* suggest that miRNAs play a role in stability control (48). It is thus not surprising that the  
315 miRNA-target interactions could be readily lost. Unlike *mir-310C* that was duplicated from *mir-92a/b*,  
316 *mir-972C* seems to have appeared from non-functional sequence and gained testes expression. Such tissue  
317 specificity may make gene loss more likely by limiting pleiotropic effects. Thus, the disappearance of the  
318 entire *mir-972* cluster in the *D. pseudoobscura* lineage is not surprising from this perspective.

319 It should be noted that as a testes-biased miRNA cluster, the fast-evolving *mir-972C* may be associated  
320 with rapid turnover of cellular environments in this tissue. It is well established that the testis is the most  
321 rapidly evolving tissue due to intense selective pressures associated with sperm competition, reproductive  
322 isolation, and sexual conflict (4). Previous investigations in many taxa have demonstrated that male-biased  
323 genes evolve relatively quickly at both the sequence and expression level (49, 50). The changes of chromatin  
324 states during spermatogenesis allow aberrant transcription which makes testes a hotspot for new gene  
325 origination (4). This cellular environment may boost the evolutionary rate of genes with which it has  
326 coevolved, including miRNAs (47, 51). Interestingly, *mir-972C* targets did not show GO enrichment in male  
327 functions, despite this cluster's preferential testes expression (Figure 3d). Why would *mir-972C* then be  
328 beneficial to the male reproductive system? One plausible explanation is the high complexity of the testes  
329 transcriptome (52) that requires substantial regulation to stabilize the system (45). *mir-972C* would be an  
330 excellent candidate to do so as it is highly abundant and broadly tied to the testes transcriptome.

331

332 **Data accessibility.** The raw data are archived in the GEO data repository with accession number GSE107390.

333

334 **Author's contributions.** Y.L., C.I.W. and T.T. conceived the study, Y.L., Z.L., J.X. and Y.C. conducted the  
335 research, Y.L. and Z.L. analyzed the data, Y.L., Z.L. and T.T. wrote the paper.

336

337 **Competing interests.** We declare we have no competing interests.

338

339 **Funding.**

340 This study was funded by the National Science Foundation of China (912311048, 31770246), the Science and  
341 Technology Program of Guangzhou (201707020035), and the Fundamental Research Funds for the Central  
342 Universities (16lgjc75).

343

344 **Acknowledgments.** This study greatly benefitted from deep sequencing data provided by the generous  
345 *Drosophila* community. We appreciate Ming Yang for statistical methods suggestions. We thank Anthony  
346 Greenberg and David Paris for valuable language editing.

347

348 **Figure legends**

349 **Figure 1. Evolutionary history of the *mir-972* cluster (*mir-972C*) in *Drosophila*.** This cluster includes ten  
350 miRNAs with distinct seeds. New (red boxes) and old (blue boxes) *mir-972C* members validated through  
351 thermostability and deep sequencing are shown. miRNA homologs without expression evidence are colored in  
352 black. Deletions and insertions observed in sequence alignments are represented by dashed lines and inverted  
353 triangles. The genomic region is not drawn to scale.

354

355 **Figure 2. *mir-972C* evolutionary rates compared to all known *Drosophila* miRNAs.** Evolutionary rates  
356 were measured by *Kp/Ks*. Error bars represent standard deviations (\*\*  $p < 0.01$ , \*  $p < 0.05$ , Wilcoxon rank-sum  
357 test). Species abbreviations: *D. mel*, *D. melanogaster*; *D. sim*, *D. simulans*; *D. ere*, *D. erecta*; *D. ana*, *D.*  
358 *ananassae*; *D. vir*, *D. virilis*.

359

360 **Figure 3. *miR-972C* target and functional evolution. (a) *miR-972C* seed innovations.** Arm switching (blue  
361 circles) and seed shifts (yellow circles) were inferred and denoted along ancestral (grey) and recent (light blue)  
362 branches. **(b&c)** Venn diagrams depict the number of shared miRNA targets. **(b)** Individual *miR-972C*  
363 member targets. **(c)** Pooled cluster targets. **(d)** Functional evolution of targets. GO categories of shared and  
364 lineage-specific targets are indicated on the corresponding evolutionary branches.

365

366 **Figure 4. *In vitro* validation of *miR-975* target divergence. (a)** Heatmap shows the log<sub>2</sub>(fold change) (LFC)  
367 of validated *miR-975* targets in the three species. **(b)** *miR-975* mature sequences from seven *Drosophila*  
368 species. They share the same seed (underlined), but their 9<sup>th</sup> nucleotide (grey box) varies among species.  
369 Species abbreviations: *dme*, *D. melanogaster*; *dsi*, *D. simulans*; *dse*, *D. sechellia*; *dya*, *D. yakuba*; *der*, *D.*  
370 *erecta*; *dan*, *D. ananassae*; *dmo*, *D. mojavensis*. **(c, d)** Bar plot demonstrates that the 3'UTR sites bound to the  
371 9<sup>th</sup> base of mature sequences are enriched for purines (A or G) in *D. melanogaster* **(c)**, but are enriched for  
372 pyrimidines (C or U) in *D. simulans* **(d)**.

373

374 **Table**

375 **Table 1 Polymorphisms and the DH test for individual *mir-972C* members**

376

| locus           | $\theta_W (10^{-3})$ | $\theta_\pi (10^{-3})$ | $\theta_H (10^{-3})$ | DH test               |
|-----------------|----------------------|------------------------|----------------------|-----------------------|
| <i>mir-972</i>  | n/a                  | n/a                    | n/a                  | n/a                   |
| <i>mir-973</i>  | 8.0                  | 1.6                    | 36.9                 | <b>&lt; 1.0E-6 **</b> |
| <i>mir-974</i>  | 4.6                  | 1.8                    | 17.6                 | <b>8.0E-3 *</b>       |
| <i>mir-2499</i> | 14.2                 | 11.2                   | 3.4                  | > 0.5                 |
| <i>mir-4966</i> | n/a                  | n/a                    | n/a                  | n/a                   |
| <i>mir-975</i>  | 3.0                  | 0.6                    | 0.0                  | <b>2.0E-2 *</b>       |
| <i>mir-976</i>  | n/a                  | n/a                    | n/a                  | n/a                   |
| <i>mir-977</i>  | 4.7                  | 3.4                    | 34.5                 | 6.0E-2                |
| <i>mir-978</i>  | 3.8                  | 0.8                    | 0.0                  | <b>4.0E-3 *</b>       |
| <i>mir-979</i>  | 3.1                  | 0.6                    | 0.0                  | <b>4.0E-3 *</b>       |

377

378 \* <0.05 \*\*<1E-4

379



380 **References**

381

- 382 1. Kondo S, Vedanayagam J, Mohammed J, Eizadshenass S, Kan L, Pang N, et al. New genes often acquire  
383 male-specific functions but rarely become essential in *Drosophila*. *Genes Dev.* 2017;31(18):1841-6.
- 384 2. Khalturin K, Hemmrich G, Fraune S, Augustin R, Bosch TC. More than just orphans: are taxonomically-restricted  
385 genes important in evolution? *Trends Genet.* 2009;25(9):404-13.
- 386 3. Chen S, Krinsky BH, Long M. New genes as drivers of phenotypic evolution. *Nat Rev Genet.* 2013;14(9):645-60.
- 387 4. Kaessmann H. Origins, evolution, and phenotypic impact of new genes. *Genome Res.* 2010;20(10):1313-26.
- 388 5. McLysaght A, Hurst LD. Open questions in the study of *de novo genes*: what, how and why. *Nat Rev Genet.*  
389 2016;17(9):567-78.
- 390 6. Gubala AM, Schmitz JF, Kearns MJ, Vinh TT, Bornberg-Bauer E, Wolfner MF, et al. The *goddard* and *saturn* genes  
391 are essential for *Drosophila* male fertility and may have arisen *de novo*. *Mol Biol Evol.* 2017;34(5):1066-82.
- 392 7. Chen S, Ni X, Krinsky BH, Zhang YE, Vibranovski MD, White KP, et al. Reshaping of global gene expression  
393 networks and sex-biased gene expression by integration of a young gene. *EMBO J.* 2012;31(12):2798-809.
- 394 8. Yeh SD, Do T, Chan C, Cordova A, Carranza F, Yamamoto EA, et al. Functional evidence that a recently evolved  
395 *Drosophila* sperm-specific gene boosts sperm competition. *Proc Natl Acad Sci U S A.* 2012;109(6):2043-8.
- 396 9. Dai H, Chen Y, Chen S, Mao Q, Kennedy D, Landback P, et al. The evolution of courtship behaviors through the  
397 origination of a new gene in *Drosophila*. *Proc Natl Acad Sci U S A.* 2008;105(21):7478-83.
- 398 10. Zhang J, Dean AM, Brunet F, Long M. Evolving protein functional diversity in new genes of *Drosophila*. *Proc Natl*  
399 *Acad Sci U S A.* 2004;101(46):16246-50.
- 400 11. Zhao L, Saclao P, Jones CD, Begun DJ. Origin and spread of *de novo* genes in *Drosophila melanogaster*  
401 populations. *Science.* 2014;343(6172):769-72.
- 402 12. Ross BD, Rosin L, Thomae AW, Hiatt MA, Vermaak D, de la Cruz AF, et al. Stepwise evolution of essential  
403 centromere function in a *Drosophila* neogene. *Science.* 2013;340(6137):1211-4.
- 404 13. Bartel DP. MicroRNAs: genomics, biogenesis, mechanism, and function. *Cell.* 2004;116(2):281-97.
- 405 14. Bartel DP. MicroRNAs: target recognition and regulatory functions. *Cell.* 2009;136(2):215-33.
- 406 15. Djuranovic S, Nahvi A, Green R. miRNA-mediated gene silencing by translational repression followed by mRNA  
407 deadenylation and decay. *Science.* 2012;336(6078):237-40.
- 408 16. Agarwal V, Bell GW, Nam JW, Bartel DP. Predicting effective microRNA target sites in mammalian mRNAs. *Elife.*  
409 2015;4.
- 410 17. Stadler M, Artiles K, Pak J, Fire A. Contributions of mRNA abundance, ribosome loading, and post- or  
411 peri-translational effects to temporal repression of *C. elegans* heterochronic miRNA targets. *Genome Res.*  
412 2012;22(12):2418-26.
- 413 18. Guo H, Ingolia NT, Weissman JS, Bartel DP. Mammalian microRNAs predominantly act to decrease target mRNA  
414 levels. *Nature.* 2010;466(7308):835-40.
- 415 19. Berezikov E. Evolution of microRNA diversity and regulation in animals. *Nat Rev Genet.* 2011;12(12):846-60.
- 416 20. Lyu Y, Shen Y, Li H, Chen Y, Guo L, Zhao Y, et al. New microRNAs in *Drosophila*--birth, death and cycles of  
417 adaptive evolution. *PLoS genetics.* 2014;10(1):e1004096.
- 418 21. Ahmed-Braimah YH, Unckless RL, Clark AG. Evolutionary dynamics of male reproductive genes in the *Drosophila*  
419 *virilis* subgroup. *G3 (Bethesda).* 2017;7(9):3145-55.
- 420 22. Brown JB, Boley N, Eisman R, May GE, Stoiber MH, Duff MO, et al. Diversity and dynamics of the *Drosophila*  
421 transcriptome. *Nature.* 2014;512(7515):393-9.
- 422 23. Czech B, Malone CD, Zhou R, Stark A, Schlingeheyde C, Dus M, et al. An endogenous small interfering RNA  
423 pathway in *Drosophila*. *Nature.* 2008;453(7196):798-802.

- 424 24. Rozhkov NV, Aravin AA, Zelentsova ES, Schostak NG, Sachidanandam R, McCombie WR, et al. Small  
425 RNA-based silencing strategies for transposons in the process of invading *Drosophila* species. *RNA* (New York, NY).  
426 2010;16(8):1634-45.
- 427 25. Hofacker IL. Vienna RNA secondary structure server. *Nucleic Acids Res.* 2003;31(13):3429-31.
- 428 26. Langmead B, Salzberg SL. Fast gapped-read alignment with Bowtie 2. *Nat Methods.* 2012;9(4):357-9.
- 429 27. Nei M, Gojobori T. Simple methods for estimating the numbers of synonymous and nonsynonymous nucleotide  
430 substitutions. *Mol Biol Evol.* 1986;3(5):418-26.
- 431 28. Kimura M. A simple method for estimating evolutionary rates of base substitutions through comparative studies of  
432 nucleotide sequences. *J Mol Evol.* 1980;16(2):111-20.
- 433 29. Tajima F. Evolutionary relationship of DNA sequences in finite populations. *Genetics.* 1983;105(2):437-60.
- 434 30. Watterson GA. On the number of segregating sites in genetical models without recombination. *Theoretical*  
435 *population biology.* 1975;7(2):256-76.
- 436 31. Fay JC, Wu CI. Hitchhiking under positive Darwinian selection. *Genetics.* 2000;155(3):1405-13.
- 437 32. Zeng K, Fu YX, Shi S, Wu CI. Statistical tests for detecting positive selection by utilizing high-frequency variants.  
438 *Genetics.* 2006;174(3):1431-9.
- 439 33. Dobin A, Davis CA, Schlesinger F, Drenkow J, Zaleski C, Jha S, et al. STAR: ultrafast universal RNA-seq aligner.  
440 *Bioinformatics* (Oxford, England). 2013;29(1):15-21.
- 441 34. Liao Y, Smyth GK, Shi W. featureCounts: an efficient general purpose program for assigning sequence reads to  
442 genomic features. *Bioinformatics* (Oxford, England). 2014;30(7):923-30.
- 443 35. Hulsen T, de Vlieg J, Alkema W. BioVenn - a web application for the comparison and visualization of biological  
444 lists using area-proportional Venn diagrams. *BMC Genomics.* 2008;9:488.
- 445 36. Huang da W, Sherman BT, Lempicki RA. Bioinformatics enrichment tools: paths toward the comprehensive  
446 functional analysis of large gene lists. *Nucleic Acids Res.* 2009;37(1):1-13.
- 447 37. He L, Xie M, Huang J, Zhang T, Shi S, Tang T. Efficient and specific inhibition of plant microRNA function by  
448 anti-microRNA oligonucleotides (AMOs) *in vitro* and *in vivo*. *Plant Cell Reports.* 2016;35(4):933-45.
- 449 38. Trapnell C, Pachter L, Salzberg SL. TopHat: discovering splice junctions with RNA-Seq. *Bioinformatics* (Oxford,  
450 England). 2009;25(9):1105-11.
- 451 39. Trapnell C, Williams BA, Pertea G, Mortazavi A, Kwan G, van Baren MJ, et al. Transcript assembly and  
452 quantification by RNA-Seq reveals unannotated transcripts and isoform switching during cell differentiation. *Nat*  
453 *Biotechnol.* 2010;28(5):511-5.
- 454 40. Consortium HGS. Insights into social insects from the genome of the honeybee *Apis mellifera*. *Nature.*  
455 2006;443(7114):931-49.
- 456 41. Yeates DK, Wiegmann BM. Congruence and controversy: toward a higher-level phylogeny of Diptera. *Annual*  
457 *review of entomology.* 1999;44:397-428.
- 458 42. Shen Y, Lv Y, Huang L, Liu W, Wen M, Tang T, et al. Testing hypotheses on the rate of molecular evolution in  
459 relation to gene expression using microRNAs. *Proc Natl Acad Sci U S A.* 2011;108(38):15942-7.
- 460 43. Zhao Y, Shen X, Tang T, Wu CI. Weak regulation of many targets is cumulatively powerful - An evolutionary  
461 perspective on microRNA functionality. *Mol Biol Evol.* 2017.
- 462 44. Wen J, Parker BJ, Jacobsen A, Krogh A. MicroRNA transfection and AGO-bound CLIP-seq data sets reveal distinct  
463 determinants of miRNA action. *RNA* (New York, NY). 2011;17(5):820-34.
- 464 45. Wu CI, Shen Y, Tang T. Evolution under canalization and the dual roles of microRNAs: a hypothesis. *Genome Res.*  
465 2009;19(5):734-43.
- 466 46. Nozawa M, Miura S, Nei M. Origins and evolution of microRNA genes in *Drosophila* species. *Genome Biol Evol.*  
467 2010;2:180-9.

- 468 47. Wang Y, Luo J, Zhang H, Lu J. microRNAs in the same clusters evolve to coordinately regulate functionally related  
469 genes. *Mol Biol Evol.* 2016;33(9):2232-47.
- 470 48. Liufu Z, Zhao Y, Guo L, Miao G, Xiao J, Lyu Y, et al. Redundant and incoherent regulations of multiple phenotypes  
471 suggest microRNAs' role in stability control. *Genome Res.* 2017;27(10):1665-73.
- 472 49. Zhang Z, Hambuch TM, Parsch J. Molecular evolution of sex-biased genes in *Drosophila*. *Mol Biol Evol.*  
473 2004;21(11):2130-9.
- 474 50. Meiklejohn CD, Parsch J, Ranz JM, Hartl DL. Rapid evolution of male-biased gene expression in *Drosophila*. *Proc*  
475 *Natl Acad Sci U S A.* 2003;100(17):9894-9.
- 476 51. Tang T, Kumar S, Shen Y, Lu J, Wu ML, Shi S, et al. Adverse interactions between micro-RNAs and target genes  
477 from different species. *Proc Natl Acad Sci U S A.* 2010;107(29):12935-40.
- 478 52. Vibranovski MD, Lopes HF, Karr TL, Long M. Stage-specific expression profiling of *Drosophila* spermatogenesis  
479 suggests that meiotic sex chromosome inactivation drives genomic relocation of testis-expressed genes. *PLoS genetics.*  
480 2009;5(11):e1000731.
- 481

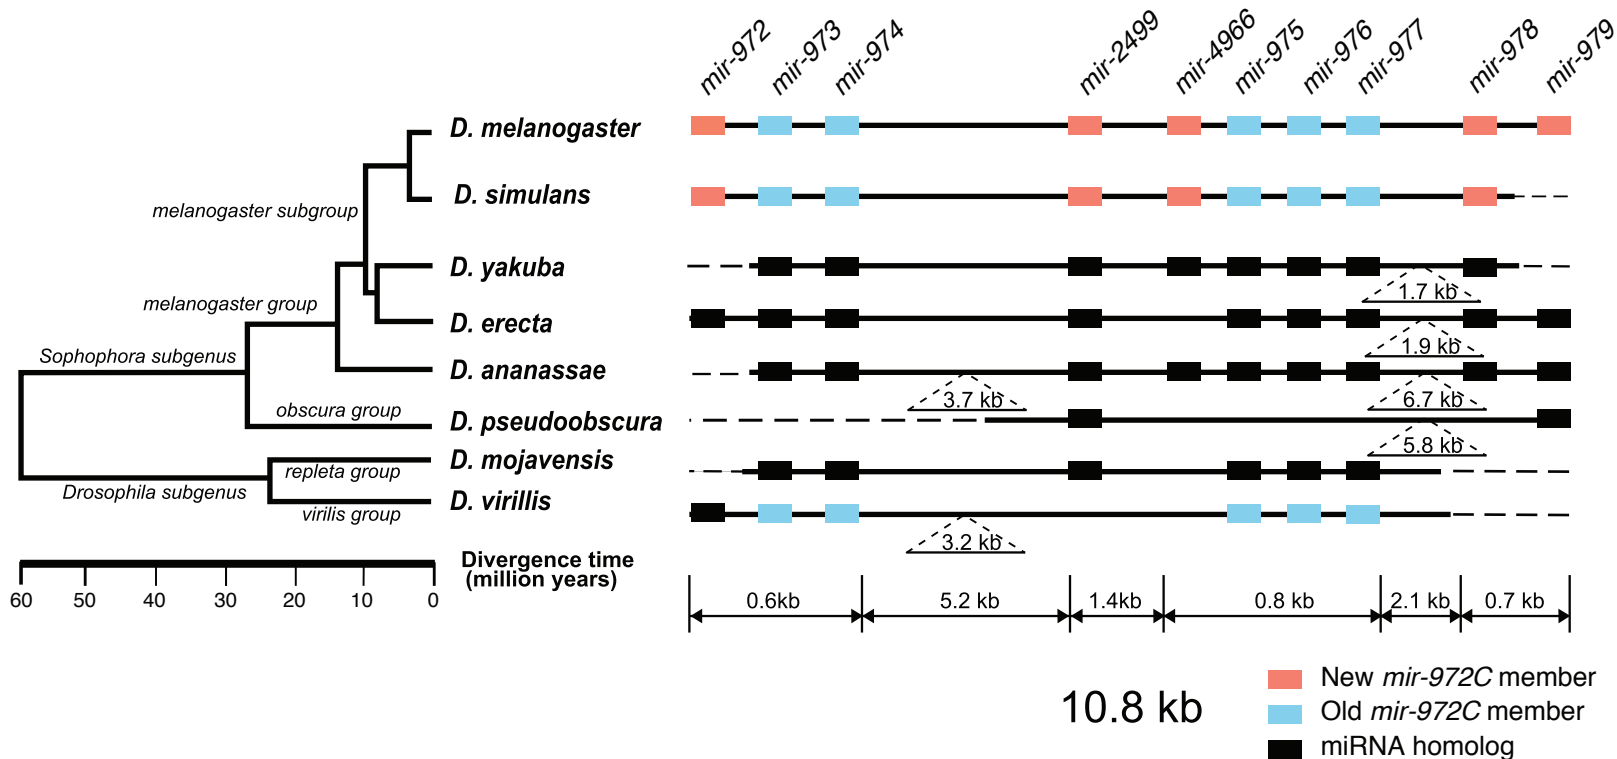

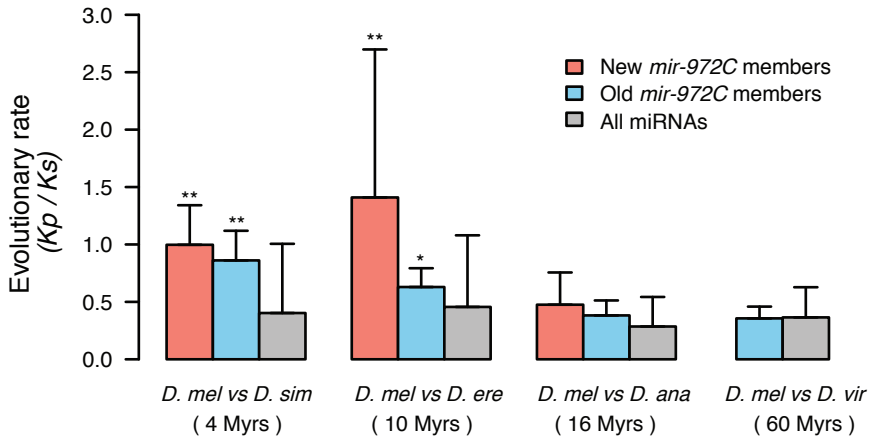

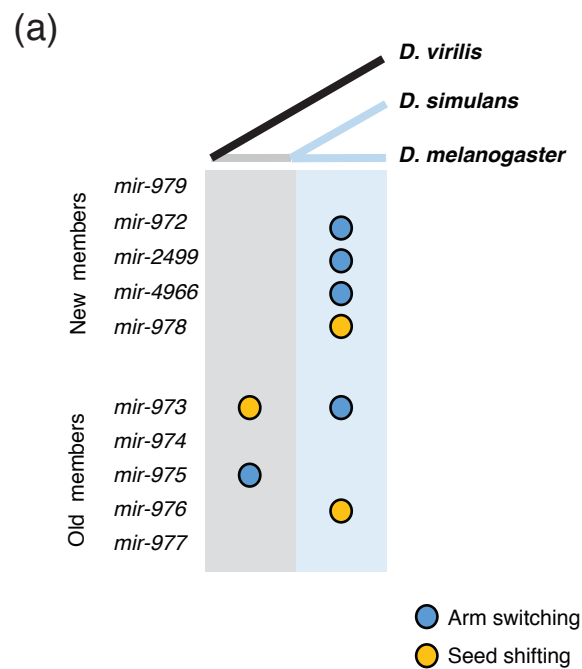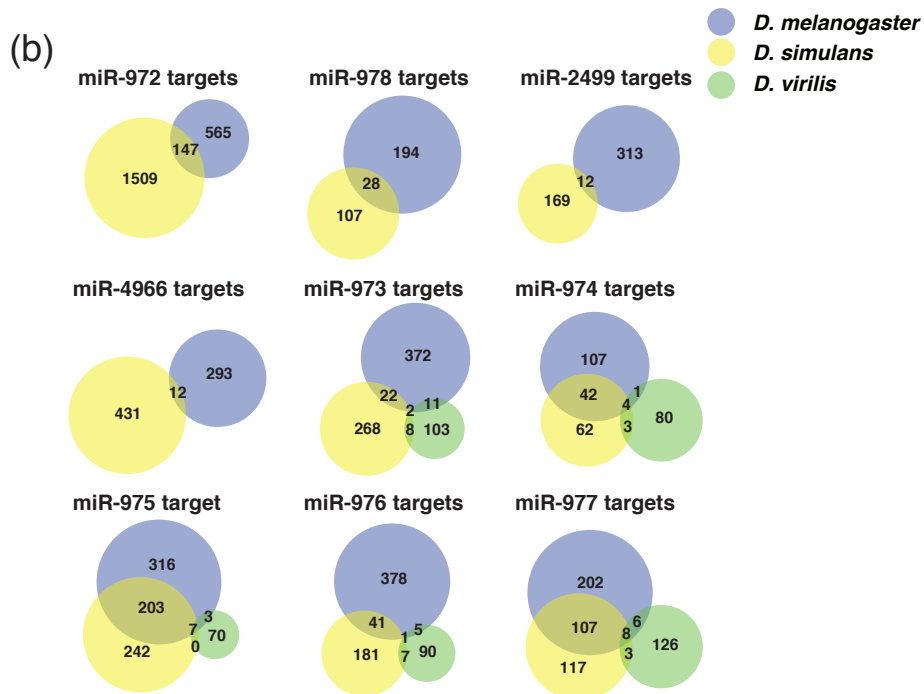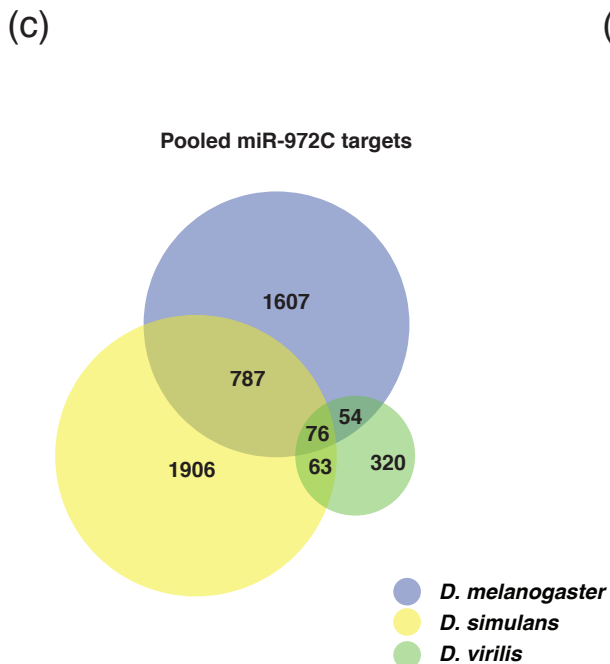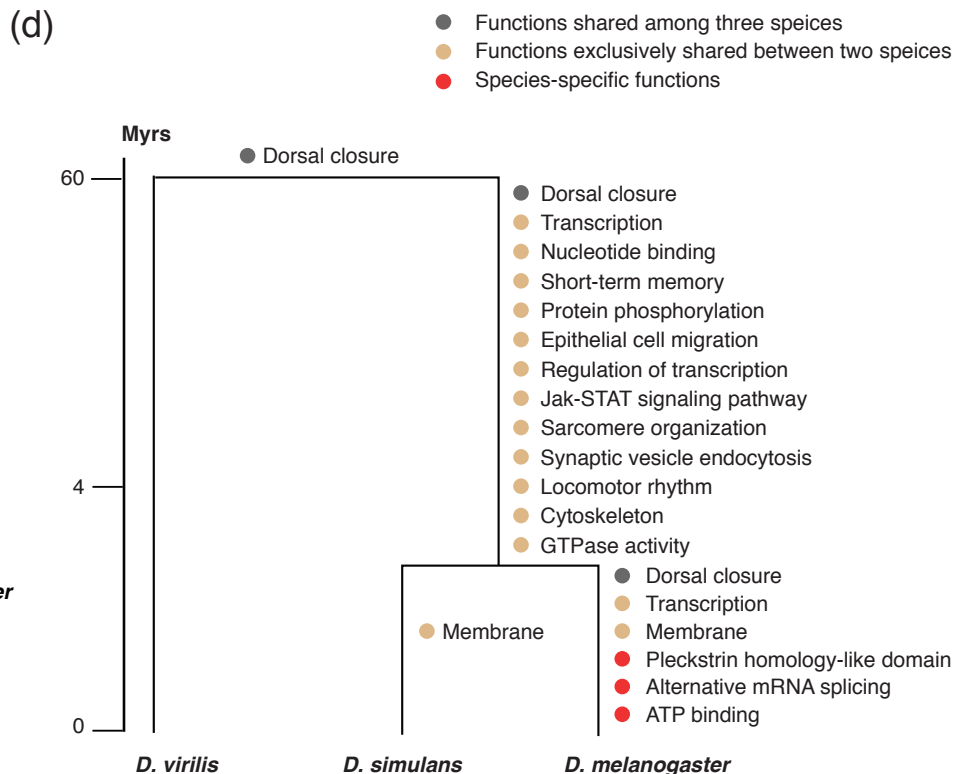

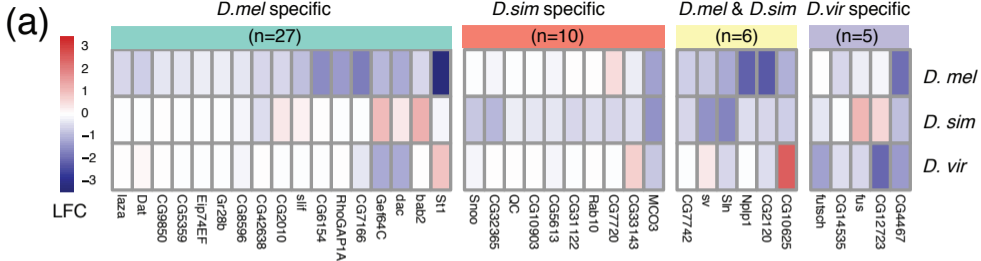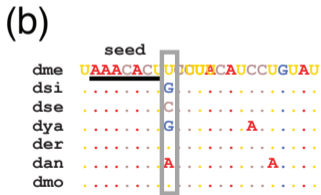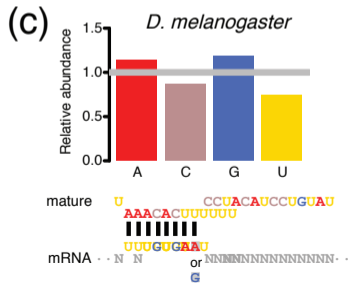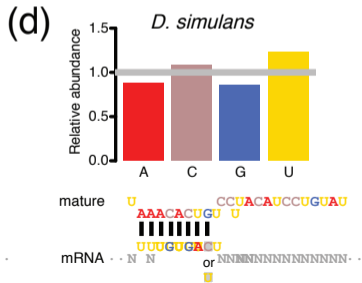

Source: http://biorxiv.org/content/10.1101/227314v1.full.pdf
